# Supplementary material for: Prevalence of rare mitochondrial DNA mutations in mitochondrial disorders
Source: HighWire-hosted journal article supplement (doi:10.1136/jmedgenet-2013-101604), 2013-07-11
Supplement: jmedgenet-2013-101604supp_figure1.pdf [file jmedgenet-2013-101604supp_figure1.pdf]

### Cluster analysis of 34 patients

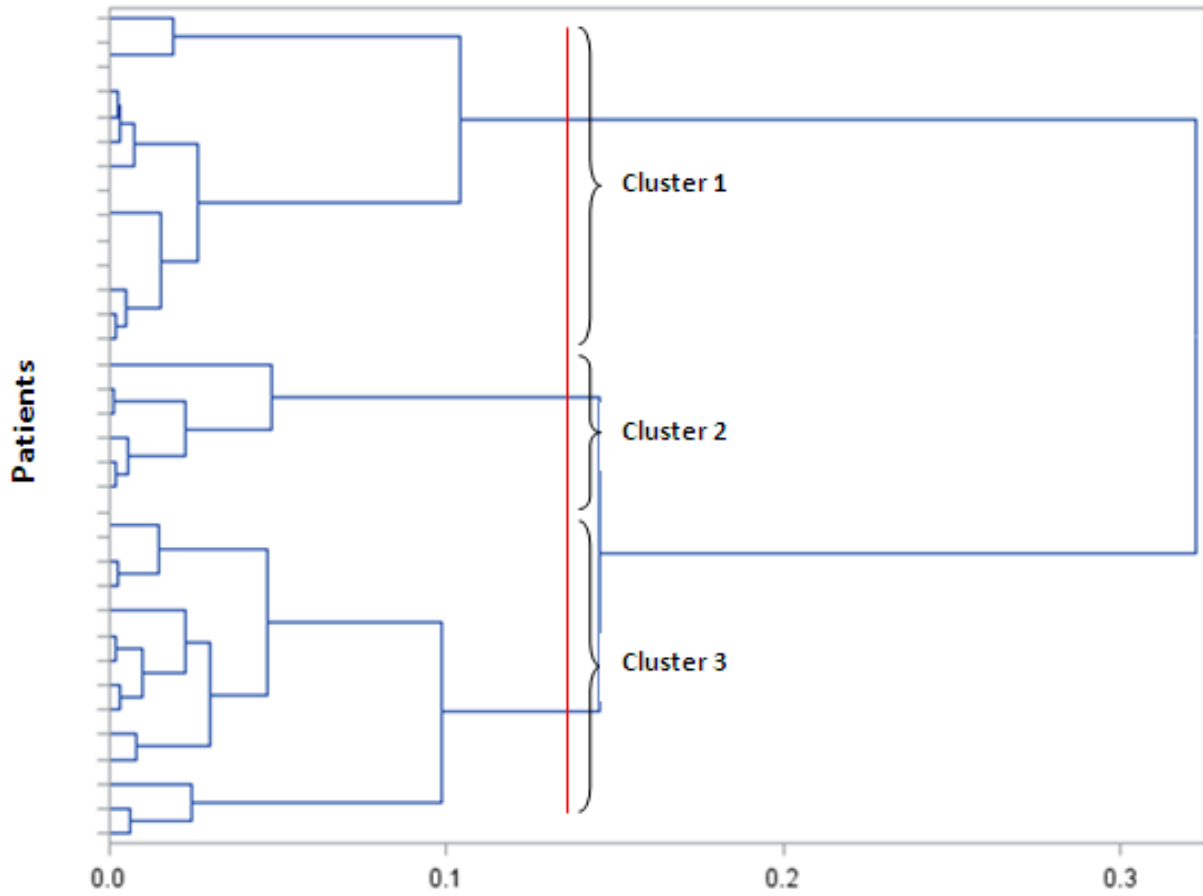

**Distance = degree of dissimilarity between clusters**

Sup. figure 1 : Statistical analyses
