# Supplementary material for: Prevalence of rare mitochondrial DNA mutations in mitochondrial disorders
Source: HighWire-hosted journal article supplement (doi:10.1136/jmedgenet-2013-101604), 2013-07-11
Supplement: jmedgenet-2013-101604supp_table1.pdf [file jmedgenet-2013-101604supp_table1.pdf]

|                                | Total population  | Population according to age of onset |                   |                     |
|--------------------------------|-------------------|--------------------------------------|-------------------|---------------------|
|                                | n=743             | Before 12 mo<br>n=356                | 1yr-16yr<br>n=192 | After 16yr<br>n=180 |
| <b>Men</b>                     | <b>395 (53.2)</b> | <b>179 (50.3)</b>                    | <b>113 (58.9)</b> | <b>92 (51.1)</b>    |
| <b>Women</b>                   | <b>348 (46.8)</b> | <b>177 (49.7)</b>                    | <b>79 (41.1)</b>  | <b>88 (48.9)</b>    |
| Consanguinity                  | 73 (9.8)          | 50 (14)                              | 15 (7.8)          | 6 (3.3)             |
| Affected maternal relatives    | 44 (5.9)          | 6 (1.7)                              | 20 (10.4)         | 17 (9.4)            |
| <b>CNS involvement</b>         | <b>540 (72.7)</b> | <b>299 (84.0)</b>                    | <b>136 (70.8)</b> | <b>94 (52.2)</b>    |
| Psychomotor retardation        | 268 (36.1)        | 198 (55.6)                           | 58 (30.2)         | 6 (3.3)             |
| Epilepsy/myoclony              | 239 (32.2)        | 153 (43.0)                           | 55 (28.6)         | 27 (15.0)           |
| Cerebellar ataxia              | 187 (25.2)        | 66 (18.5)                            | 71 (37.0)         | 45 (25.0)           |
| Encephalopathy                 | 169 (22.7)        | 134 (37.6)                           | 25 (13.0)         | 7 (3.9)             |
| Movement disorders             | 129 (17.4)        | 82 (23.0)                            | 31 (16.1)         | 12 (6.7)            |
| Regression                     | 109 (14.7)        | 72 (20.2)                            | 29 (15.1)         | 6 (3.3)             |
| Stroke-like episodes           | 48 (6.5)          | 10 (2.8)                             | 18 (9.4)          | 20 (11.1)           |
| Migraine-like headaches        | 32 (4.3)          | 5 (1.4)                              | 13 (6.8)          | 14 (7.8)            |
| Pyramidal symptoms             | 31 (4.2)          | 10 (2.8)                             | 10 (5.2)          | 11 (6.1)            |
| Cognitive impairment           | 29 (3.9)          | 0 (0.0)                              | 12 (6.3)          | 17 (9.4)            |
| Psychiatric disorders          | 15 (2.0)          | 5 (1.4)                              | 2 (1.0)           | 8 (4.4)             |
| Central respiratory depression | 12 (1.6)          | 11 (3.1)                             | 1 (0.5)           | 0 (0.0)             |
| Cortical blindness             | 9 (1.2)           | 7 (2.0)                              | 1 (0.5)           | 1 (0.6)             |
| Bulbar involvement             | 9 (1.2)           | 5 (1.4)                              | 0 (0.0)           | 4 (2.2)             |
| Deterioration under valproate  | 6 (0.8)           | 3 (0.8)                              | 2 (1.0)           | 1 (0.6)             |
| Others...                      | 10 (1.3)          | 6 (1.7)                              | 0 (0.0)           | 4 (2.2)             |
| <b>Muscular involvement</b>    | <b>418 (56.3)</b> | <b>164 (46.1)</b>                    | <b>123 (64.1)</b> | <b>124 (68.9)</b>   |
| Hypotonia                      | 168 (22.6)        | 133 (37.4)                           | 30 (15.6)         | 3 (1.7)             |
| Myopathy                       | 162 (21.8)        | 42 (11.8)                            | 50 (26.0)         | 68 (37.8)           |
| CPEO                           | 137 (18.4)        | 26 (7.3)                             | 52 (27.1)         | 58 (32.2)           |
| Others...                      | 121 (16.3)        | 13 (3.7)                             | 48 (25.0)         | 57 (31.7)           |
| <b>Growth failure</b>          | <b>167 (22.5)</b> | <b>132 (37.1)</b>                    | <b>31 (16.1)</b>  | <b>1 (0.6)</b>      |
| Postnatal                      | 136 (18.3)        | 105 (29.5)                           | 27 (14.1)         | 1 (0.6)             |
| Antenatal                      | 52 (7.0)          | 43 (12.1)                            | 8 (4.2)           | 0 (0.0)             |
| <b>Ocular involvement</b>      | <b>138 (18.6)</b> | <b>65 (18.3)</b>                     | <b>43 (22.4)</b>  | <b>29 (16.1)</b>    |
| Optic atrophy                  | 52 (7.0)          | 21 (5.9)                             | 22 (11.5)         | 9 (5.0)             |
| Pigmentary retinopathy         | 35 (4.7)          | 20 (5.6)                             | 10 (5.2)          | 4 (2.2)             |
| Cataract                       | 22 (3.0)          | 8 (2.2)                              | 4 (2.1)           | 9 (5.0)             |
| Others...                      | 43 (5.8)          | 20 (5.6)                             | 11 (5.7)          | 12 (6.7)            |
| <b>Heart involvement</b>       | <b>131 (17.6)</b> | <b>77 (21.6)</b>                     | <b>28 (14.6)</b>  | <b>25 (13.9)</b>    |
| Hypertrophic cardiomyopathy    | 58 (7.8)          | 39 (11.0)                            | 11 (5.7)          | 8 (4.4)             |
| Dilated cardiomyopathy         | 34 (4.6)          | 21 (5.9)                             | 9 (4.7)           | 4 (2.2)             |
| Restrictive cardiomyopathy     | 4 (0.5)           | 1 (0.3)                              | 2 (1.0)           | 1 (0.6)             |
| Others...                      | 43 (5.8)          | 19 (5.3)                             | 9 (4.7)           | 14 (7.8)            |
| <b>Liver involvement</b>       | <b>123 (16.6)</b> | <b>99 (27.8)</b>                     | <b>12 (6.3)</b>   | <b>11 (6.1)</b>     |
| <b>Deafness</b>                | <b>113 (15.2)</b> | <b>37 (10.4)</b>                     | <b>40 (20.8)</b>  | <b>32 (17.8)</b>    |
| <b>Peripheral neuropathy</b>   | <b>94 (12.7)</b>  | <b>21 (5.9)</b>                      | <b>27 (14.1)</b>  | <b>44 (24.4)</b>    |
| <b>Digestive disorders</b>     | <b>58 (7.8)</b>   | <b>35 (9.8)</b>                      | <b>17 (8.9)</b>   | <b>6 (3.3)</b>      |
| Transit disorders              | 39 (5.2)          | 24 (6.7)                             | 11 (5.7)          | 4 (2.2)             |
| Others...                      | 25 (3.3)          | 16 (4.5)                             | 7 (3.6)           | 2 (1.1)             |
| <b>Blood disorders</b>         | <b>53 (7.1)</b>   | <b>42 (11.8)</b>                     | <b>10 (5.2)</b>   | <b>1 (0.6)</b>      |
| Anemia                         | 43 (5.8)          | 34 (9.6)                             | 8 (4.2)           | 1 (0.6)             |
| Neutropenia                    | 10 (1.3)          | 9 (2.5)                              | 1 (0.5)           | 0 (0.0)             |
| Others...                      | 9 (1.2)           | 8 (2.2)                              | 1 (0.5)           | 0 (0.0)             |
| <b>Renal involvement</b>       | <b>59 (7.9)</b>   | <b>41 (11.5)</b>                     | <b>13 (6.8)</b>   | <b>3 (1.7)</b>      |
| <b>Diabetes</b>                | <b>45 (6.1)</b>   | <b>9 (2.5)</b>                       | <b>14 (7.3)</b>   | <b>21 (11.7)</b>    |
| <b>Endocrine disorders</b>     | <b>19 (2.6)</b>   | <b>7 (2.0)</b>                       | <b>5 (2.6)</b>    | <b>6 (3.3)</b>      |
| <b>Malformative disorders</b>  | <b>16 (2.2)</b>   | <b>15 (4.2)</b>                      | <b>0 (0.0)</b>    | <b>0 (0.0)</b>      |
| <b>Microcephaly</b>            | <b>11 (1.5)</b>   | <b>11 (3.1)</b>                      | <b>0 (0.0)</b>    | <b>0 (0.0)</b>      |
| <b>Lipomas</b>                 | <b>5 (0.7)</b>    | <b>0 (0.0)</b>                       | <b>2 (1.0)</b>    | <b>3 (1.7)</b>      |
| <b>Others...</b>               | <b>25 (3.3)</b>   | <b>12 (3.3)</b>                      | <b>3 (1.5)</b>    | <b>10 (5.5)</b>     |

Sup. table 1 : Clinical characteristics of 743 patients suspected of manifesting a mitochondrial disorder
