# Supplementary material for: Prevalence of rare mitochondrial DNA mutations in mitochondrial disorders
Source: HighWire-hosted journal article supplement (doi:10.1136/jmedgenet-2013-101604), 2013-07-11
Supplement: jmedgenet-2013-101604supp_table2.pdf [file jmedgenet-2013-101604supp_table2.pdf]

|                                       | Total population | Population according to age of onset |              |             |
|---------------------------------------|------------------|--------------------------------------|--------------|-------------|
|                                       |                  | Before 12 mo                         | 1yr-16yr     | After 16yr  |
| <b>Brain MRI</b>                      | <b>n=527</b>     | <b>n=290</b>                         | <b>n=132</b> | <b>n=96</b> |
| Leigh, Leigh-like syndrome            | 177 (33.6)       | 125 (43.1)                           | 37 (28.0)    | 11 (11.5)   |
| White matter involvement              | 156 (29.6)       | 81 (27.9)                            | 30 (22.7)    | 42 (43.8)   |
| Posterior fossa atrophy / hypoplasia  | 127 (24.1)       | 70 (24.1)                            | 39 (29.5)    | 16 (16.7)   |
| Cerebral atrophy                      | 55 (10.4)        | 33 (11.4)                            | 13 (9.8)     | 9 (9.4)     |
| Leukodystrophy                        | 33 (6.3)         | 17 (5.9)                             | 11 (8.3)     | 5 (5.2)     |
| Stroke, stroke-like                   | 27 (5.1)         | 8 (2.8)                              | 10 (7.6)     | 9 (9.4)     |
| Thalamic lesions                      | 25 (4.7)         | 22 (7.6)                             | 1 (0.8)      | 1 (1.0)     |
| Posterior cortical lesions            | 24 (4.6)         | 12 (4.1)                             | 7 (5.3)      | 3 (3.1)     |
| Corpus callosum lesions               | 17 (3.2)         | 15 (5.2)                             | 0 (0.0)      | 2 (2.1)     |
| Internal capsule lesions              | 16 (3.0)         | 9 (3.1)                              | 2 (1.5)      | 5 (5.2)     |
| Cerebellar hypersignal                | 10 (1.9)         | 6 (2.1)                              | 3 (2.3)      | 1 (1.0)     |
| Abnormalities of gyration             | 8 (1.5)          | 7 (2.4)                              | 1 (0.8)      | 0 (0.0)     |
| Calcifications                        | 4 (0.8)          | 2 (0.7)                              | 1 (0.8)      | 1 (1.0)     |
| Others                                | 28 (5.3)         | 15 (5.2)                             | 5 (3.8)      | 8 (8.3)     |
| Normal                                | 126 (23.9)       | 52 (17.9)                            | 43 (32.6)    | 29 (30.2)   |
| <b>MRI spectroscopy</b>               | <b>n=175</b>     | <b>n=116</b>                         | <b>n=44</b>  | <b>n=11</b> |
| Presence of lactate peak              | 106 (60.6)       | 79 (68.1)                            | 22 (50.0)    | 2 (18.2)    |
| Absence of lactate peak               | 69 (39.4)        | 37 (31.9)                            | 22 (50.0)    | 9 (81.8)    |
| <b>Metabolic screening</b>            |                  |                                      |              |             |
| <b>Blood</b>                          |                  |                                      |              |             |
| <b>Standard test</b>                  | <b>n=525</b>     | <b>n=309</b>                         | <b>n=144</b> | <b>n=66</b> |
| Hyperlactacidemia                     | 266 (50.7)       | 168 (54.4)                           | 65 (45.1)    | 30 (45.5)   |
| Hypoglycaemia                         | 27 (5.1)         | 20 (6.4)                             | 3 (2.1)      | 3 (4.5)     |
| <b>Lactate/Pyruvate</b>               | <b>n=385</b>     | <b>n=232</b>                         | <b>n=105</b> | <b>n=43</b> |
| Elevated                              | 193 (50.1)       | 121 (52.2)                           | 47 (44.8)    | 24 (55.8)   |
| Normal                                | 192 (49.9)       | 111 (47.8)                           | 58 (55.2)    | 19 (44.2)   |
| <b>OH-but/Ac-Ac</b>                   | <b>n=244</b>     | <b>n=158</b>                         | <b>n=64</b>  | <b>n=18</b> |
| Elevated                              | 66 (27.0)        | 43 (27.2)                            | 19 (29.7)    | 4 (22.2)    |
| Normal                                | 178 (73.0)       | 115 (72.8)                           | 45 (70.3)    | 14 (77.8)   |
| <b>Plasma amino acids</b>             | <b>n=300</b>     | <b>n=196</b>                         | <b>n=77</b>  | <b>n=23</b> |
| Elevated alanine and/or proline       | 26 (8.7)         | 11 (5.6)                             | 12 (15.6)    | 3 (13.0)    |
| Other abnormalities                   | 9 (3.0)          | 4 (2.0)                              | 4 (5.2)      | 1 (4.4)     |
| Normal                                | 265 (88.3)       | 181 (92.4)                           | 61 (79.2)    | 19 (82.6)   |
| <b>Plasma carnitine/acylcarnitine</b> | <b>n=208</b>     | <b>n=131</b>                         | <b>n=58</b>  | <b>n=15</b> |
| Decreased                             | 10 (4.8)         | 6 (4.6)                              | 4 (6.9)      | 0 (0.0)     |
| Elevated                              | 3 (1.4)          | 3 (2.3)                              | 0 (0.0)      | 0 (0.0)     |
| Normal                                | 195 (93.8)       | 122 (93.1)                           | 54 (93.1)    | 15 (100)    |
| <b>CSF lactate</b>                    | <b>n=146</b>     | <b>n=98</b>                          | <b>n=36</b>  | <b>n=11</b> |
| Hyperlactatorachia                    | 110 (75.3)       | 75 (76.5)                            | 30 (83.3)    | 5 (45.5)    |
| Normal                                | 36 (24.7)        | 23 (23.5)                            | 6 (16.7)     | 6 (54.5)    |
| <b>Urinary organic acids</b>          | <b>n=360</b>     | <b>n=237</b>                         | <b>n=93</b>  | <b>n=24</b> |
| Elevated Krebs cycle intermed.        | 15 (4.2)         | 9 (3.8)                              | 5 (5.4)      | 1 (4.2)     |
| Elevated Urinary 3-MGC acid           | 9 (2.5)          | 7 (3.0)                              | 2 (2.2)      | 0 (0.0)     |
| Other abnormalities                   | 7 (1.9)          | 5 (2.1)                              | 1 (1.1)      | 1 (4.2)     |
| Normal                                | 329 (91.4)       | 216 (91.1)                           | 85 (91.4)    | 22 (91.7)   |

Sup. table 2 : Paraclinical investigations
