# Supplementary material for: Prevalence of rare mitochondrial DNA mutations in mitochondrial disorders
Source: HighWire-hosted journal article supplement (doi:10.1136/jmedgenet-2013-101604), 2013-07-11
Supplement: jmedgenet-2013-101604supp_table3.pdf [file jmedgenet-2013-101604supp_table3.pdf]

|                                   | Total population | Population according to age of onset |              |              |
|-----------------------------------|------------------|--------------------------------------|--------------|--------------|
|                                   |                  | Before 12 mo                         | 1yr-16yr     | After 16yr   |
| <b>Muscle histology</b>           | <b>n=637</b>     | <b>n=292</b>                         | <b>n=161</b> | <b>n=174</b> |
| Lipid myopathy                    | 191 (30.0)       | 100 (34.2)                           | 46 (28.6)    | 42 (24.1)    |
| RRF                               | 184 (28.9)       | 42 (14.4)                            | 54 (33.5)    | 85 (48.9)    |
| COX-negative fibers               | 176 (27.6)       | 31 (10.6)                            | 43 (26.7)    | 99 (56.9)    |
| Minimal abnormalities             | 29 (4.6)         | 12 (4.1)                             | 10 (6.2)     | 7 (4.0)      |
| Normal                            | 273 (42.9)       | 152 (52.1)                           | 68 (42.2)    | 49 (28.2)    |
| <b>Spectrophotometry analysis</b> |                  |                                      |              |              |
| <b>Muscle</b>                     | <b>n=653</b>     | <b>n=331</b>                         | <b>n=165</b> | <b>n=144</b> |
| Isolated deficiency               | 204 (31.2)       | 94 (28.4)                            | 63 (38.2)    | 45 (31.3)    |
| Multiple deficiency               | 184 (28.2)       | 113 (34.1)                           | 34 (20.6)    | 33 (22.9)    |
| Normal                            | 265 (40.6)       | 124 (37.5)                           | 68 (41.2)    | 66 (45.8)    |
| <b>Fibroblasts</b>                | <b>n=238</b>     | <b>n=153</b>                         | <b>n=58</b>  | <b>n=20</b>  |
| Isolated deficiency               | 68 (28.6)        | 37 (24.2)                            | 24 (41.4)    | 7 (35.0)     |
| Multiple deficiency               | 31 (13.0)        | 17 (11.1)                            | 6 (10.3)     | 8 (40.0)     |
| Normal                            | 139 (58.4)       | 99 (64.7)                            | 28 (48.3)    | 5 (25.0)     |
| <b>Liver</b>                      | <b>n=122</b>     | <b>n=102</b>                         | <b>n=15</b>  | <b>n=2</b>   |
| Isolated deficiency               | 38 (31.1)        | 32 (31.4)                            | 6 (40.0)     | 0 (0.0)      |
| Multiple deficiency               | 32 (26.3)        | 23 (22.5)                            | 6 (40.0)     | 2 (100.0)    |
| Normal                            | 52 (42.6)        | 47 (46.1)                            | 3 (20.0)     | 0 (0.0)      |
| <b>Heart</b>                      | <b>n=10</b>      | <b>n=6</b>                           | <b>n=4</b>   | <b>n=0</b>   |
| Isolated deficiency               | 3 (30.0)         | 2 (33.3)                             | 1 (25.0)     | -            |
| Multiple deficiency               | 3 (30.0)         | 2 (33.3)                             | 1 (25.0)     | -            |
| Normal                            | 4 (40.0)         | 2 (33.3)                             | 2 (50.0)     | -            |
| <b>Kidney</b>                     | <b>n=4</b>       | <b>n=3</b>                           | <b>n=0</b>   | <b>n=0</b>   |
| Isolated deficiency               | 1 (25.0)         | 1 (33.3)                             | -            | -            |
| Multiple deficiency               | 2 (50.0)         | 1 (33.3)                             | -            | -            |
| Normal                            | 1 (25.0)         | 1 (33.3)                             | -            | -            |
| <b>Lymphocytes</b>                | <b>n=3</b>       | <b>n=1</b>                           | <b>n=2</b>   | <b>n=0</b>   |
| Isolated deficiency               | 1 (33.3)         | 1 (100.0)                            | 0 (0.0)      | -            |
| Multiple deficiency               | 2 (66.7)         | 0 (0.0)                              | 2 (100.0)    | -            |
| Normal                            | 0 (0.0)          | 0 (0.0)                              | 0 (0.0)      | -            |

Sup. table 3 : Histological and biochemical analyses of tissue samples
