# Supplementary material for: Prevalence of rare mitochondrial DNA mutations in mitochondrial disorders
Source: HighWire-hosted journal article supplement (doi:10.1136/jmedgenet-2013-101604), 2013-07-11
Supplement: jmedgenet-2013-101604supp_table4.pdf [file jmedgenet-2013-101604supp_table4.pdf]

| Gene          | Sequence variation                       | N° of occur | Phylogenetic conservation | Haplogroup | Presence in mtDB database | Polyphen 2 | SIFT          |
|---------------|------------------------------------------|-------------|---------------------------|------------|---------------------------|------------|---------------|
| <i>MTTF</i>   | m.579T>C                                 | 1           | -                         | V          | No                        | -          | -             |
|               | m.592C>T                                 | 1           | -                         | J1         | No                        | -          | -             |
|               | <b>m.636A&gt;G</b>                       | 1           | -                         | H          | No                        | -          | -             |
|               | m.645A>G                                 | 1           | -                         | H          | No                        | -          | -             |
| <i>MTRNR1</i> | m.1151C>A                                | 1           | Low                       | K          | No                        | -          | -             |
|               | m.1386T>C                                | 1           | Low                       | H          | No                        | -          | -             |
| <i>MTTV</i>   | m.1645A>G                                | 1           | -                         | H          | No                        | -          | -             |
| <i>MTRNR2</i> | m.1917A>G                                | 1           | High                      | T          | No                        | -          | -             |
|               | m.1938A>T                                | 2           | Low                       | H, J1      | No                        | -          | -             |
|               | m.2050A>T                                | 1           | High                      | J1         | No                        | -          | -             |
|               | m.2108G>A                                | 1           | High                      | L1         | No                        | -          | -             |
|               | m.2137C>T                                | 1           | High                      | L1         | No                        | -          | -             |
|               | m.2418_2419delAC                         | 1           | -                         | H          | No                        | -          | -             |
|               | m.2639C>A                                | 1           | Low                       | L2         | No                        | -          | -             |
|               | m.2865C>T                                | 1           | Low                       | V          | No                        | -          | -             |
| m.3170C>T     | 1                                        | Low         | U                         | No         | -                         | -          |               |
| <i>MTTL1</i>  | <b>m.3258T&gt;C</b>                      | 1           | -                         | U          | No                        | -          | -             |
| <i>MTND1</i>  | <b>m.3460G&gt;A (p.Ala52Thr)</b>         | 1           | Medium                    | J1         | 2                         | Damaging   | Not tolerated |
|               | m.3488T>C (p.Leu61Pro)                   | 1           | Low                       | H          | No                        | Damaging   | Not tolerated |
|               | m.3764C>T (p.Thr153Met)                  | 1           | Low                       | U          | 1                         | Damaging   | Tolerated     |
| <i>MTT1</i>   | <b>m.4317A&gt;G</b>                      | 1           | -                         | T          | No                        | -          | -             |
|               | <b>m.4317delA</b>                        | 1           | -                         | ND         | No                        | -          | -             |
| <i>MTTM</i>   | m.4449G>A                                | 1           | -                         | J1         | No                        | -          | -             |
| <i>MTND2</i>  | m.4746T>C (p.Tyr93His)                   | 1           | Low                       | T          | No                        | Damaging   | Tolerated     |
|               | m.4935A>G (p.Thr156Ala)                  | 1           | Low                       | T          | No                        | Benign     | Tolerated     |
| <i>MTTW</i>   | m.5560G>A                                | 1           | -                         | U          | No                        | -          | -             |
| <i>MTTN</i>   | <b>m.5667G&gt;A</b>                      | 1           | -                         | H          | No                        | -          | -             |
|               | <b>m.5728T&gt;C</b>                      | 1           | -                         | H          | No                        | -          | -             |
| <i>MTTC</i>   | m.5800A>G                                | 1           | -                         | T          | No                        | -          | -             |
| <i>MTTY</i>   | m.5865T>C                                | 1           | -                         | H          | No                        | -          | -             |
| <i>MTCO1</i>  | m.6736T>C (p.Met278Thr)                  | 1           | Medium                    | T          | No                        | Benign     | Not tolerated |
| <i>MTTS1</i>  | <b>m.7472_7473InsC</b>                   | 1           | -                         | H          | No                        | -          | -             |
| <i>MTCO2</i>  | m.7745A>G (p.Asn54Asp)                   | 1           | Low                       | T          | No                        | Benign     | Tolerated     |
|               | m.7887G>C (p.Gly101Ala)                  | 1           | High                      | T          | No                        | Damaging   | Not tolerated |
| <i>MTTK</i>   | <b>m.8362T&gt;G</b>                      | 1           | -                         | T          | No                        | -          | -             |
| <i>MTATP8</i> | m.8394C>T (p.Pro10Leu)                   | 1           | Low                       | L2         | No                        | Damaging   | Tolerated     |
| <i>MTATP6</i> | m.8563A>C (p.Thr13Pro)                   | 1           | Low                       | H          | No                        | Damaging   | Not tolerated |
|               | <b>m.8609_8610InsC (p.Leu29Serfs*36)</b> | 1           | -                         | ND         | No                        | -          | -             |
|               | m.8866A>G (p.Ile114Val)                  | 1           | Low                       | T          | No                        | Benign     | Tolerated     |
|               | m.8902G>A (p.Ala126Thr)                  | 1           | Medium                    | ND         | No                        | Benign     | Not tolerated |
|               | m.9145G>T (p.Ala207Ser)                  | 1           | High                      | H          | No                        | Damaging   | Not tolerated |
|               | <b>m.9185T&gt;C (p.Leu220Pro)</b>        | 2           | High                      | H, M1      | No                        | Damaging   | Not tolerated |
| <i>MTCO3</i>  | m.9909T>C (p.Phe235Leu)                  | 1           | High                      | W          | No                        | Damaging   | Not tolerated |
| <i>MTTG</i>   | <b>m.10010T&gt;C</b>                     | 1           | -                         | M1         | No                        | -          | -             |
| <i>MTND3</i>  | m.10111T>C (p.Met18Thr)                  | 1           | Low                       | T          | No                        | Damaging   | Tolerated     |
|               | <b>m.10191T&gt;C (p.Ser45Pro)</b>        | 2           | Low                       | U, M1      | No                        | Damaging   | Not tolerated |
| <i>MTND4</i>  | m.10826A>G (p.Ile23Val)                  | 1           | Low                       | T          | No                        | Damaging   | Tolerated     |
|               | m.10856A>G (p.Ile33Val)                  | 1           | Low                       | H          | No                        | Damaging   | Tolerated     |
|               | m.10866T>C (p.Ile36Thr)                  | 1           | Low                       | H          | No                        | Benign     | Tolerated     |
|               | <b>m.11778G&gt;A (p.Arg340His)</b>       | 1           | High                      | K          | 2                         | Damaging   | Not tolerated |
|               | m.11936C>G (p.Leu393Val)                 | 1           | Low                       | T          | No                        | Benign     | Not tolerated |
|               | m.12134T>A (p.Ser459Thr)                 | 1           | Low                       | H          | No                        | Benign     | Tolerated     |
| <i>MTHH</i>   | m.12168G>A                               | 1           | -                         | H          | No                        | -          | -             |
|               | m.12197_12198InsC                        | 1           | -                         | W          | No                        | -          | -             |
| <i>MTTS2</i>  | <b>m.12236G&gt;A</b>                     | 1           | -                         | ND         | 21                        | -          | -             |

|              |                                                   |   |        |             |    |          |               |
|--------------|---------------------------------------------------|---|--------|-------------|----|----------|---------------|
| <i>MTTL2</i> | <b>m.12276G&gt;A</b>                              | 1 | -      | H           | No | -        | -             |
|              | <b>m.12316G&gt;A</b>                              | 1 | -      | H           | No | -        | -             |
|              | m.12324C>T                                        | 1 | -      | W           | No | -        | -             |
| <i>MTND5</i> | <b>m.12414delT</b><br><b>(p.Asn27Thrfs*10)</b>    | 1 | -      | H           | No | -        | -             |
|              | <b>m.12706T&gt;C (p.Phe124Leu)</b>                | 2 | High   | K, ND       | No | Damaging | Not tolerated |
|              | m.13108T>C (p.Phe258Leu)                          | 1 | Medium | K           | No | Damaging | Not tolerated |
|              | m.13336T>C (p.Phe334Leu)                          | 1 | Medium | ND          | No | Damaging | Not tolerated |
|              | m.13339T>C (p.Phe335Leu)                          | 1 | High   | J1          | No | Damaging | Not tolerated |
|              | <b>m.13513G&gt;A (p.Asp393Asn)</b>                | 4 | High   | H, H, T, ND | No | Damaging | Not tolerated |
|              | <b>m.13514A&gt;G (p.Asp393Gly)</b>                | 2 | High   | K, ND       | No | Damaging | Not tolerated |
|              | m.13604G>C (p.Ser423Thr)                          | 2 | High   | I, ND       | No | Damaging | Not tolerated |
|              | m.13804G>A (p.Ala490Thr)                          | 1 | Medium | H           | No | Damaging | Not tolerated |
|              | m.13931T>C (p.Ile532Thr)                          | 1 | Medium | V           | No | Benign   | Tolerated     |
|              | m.13945A>G (p.Ile537Val)                          | 1 | Low    | L3          | No | Benign   | Tolerated     |
|              | m.14065A>G (p.Thr577Ala)                          | 1 | Low    | H           | No | Benign   | Tolerated     |
| <i>MTND6</i> | m.14328C>T (p.Val116Met)                          | 1 | Low    | K           | No | Benign   | Tolerated     |
|              | <b>m.14487T&gt;C (p.Met63Val)</b>                 | 3 | Medium | H, H, T     | No | Damaging | Not tolerated |
|              | <b>m.14535_14536InsC</b><br><b>(p.Phe46fs*61)</b> | 1 | -      | T           | No | -        | -             |
| <i>MTTE</i>  | <b>m.14710G&gt;A</b>                              | 1 | -      | H           | No | -        | -             |
|              | <b>m.14724G&gt;A</b>                              | 1 | -      | T           | No | -        | -             |
| <i>MTCYB</i> | m.14924T>C (p.Ser60Pro)                           | 1 | Low    | T           | No | Damaging | Not tolerated |
|              | m.15295C>A (p.Phe183Leu)                          | 1 | High   | U           | No | Damaging | Not tolerated |
|              | m.15537C>G (p.Thr264Ser)                          | 1 | High   | J1          | No | Benign   | Not tolerated |
|              | m.15542C>T (p.Pro266Ser)                          | 1 | Medium | H           | No | Damaging | Not tolerated |
|              | <b>m.15699G&gt;C (p.Arg318Pro)</b>                | 1 | Medium | H           | No | Damaging | Not tolerated |
| <i>MTTT</i>  | m.15926C>T                                        | 1 | -      | U           | No | -        | -             |
| <i>MTTP</i>  | m.15992A>T                                        | 1 | -      | J1          | No | -        | -             |

Sup. table 4 : Mitochondrial DNA variants identified by Surveyor analysis
