# Supplementary figures and images for: Prevalence of rare mitochondrial DNA mutations in mitochondrial disorders
Source: HighWire-hosted journal article supplement (doi:10.1136/jmedgenet-2013-101604), 2013-07-11

**Cluster analysis of 55 patients**

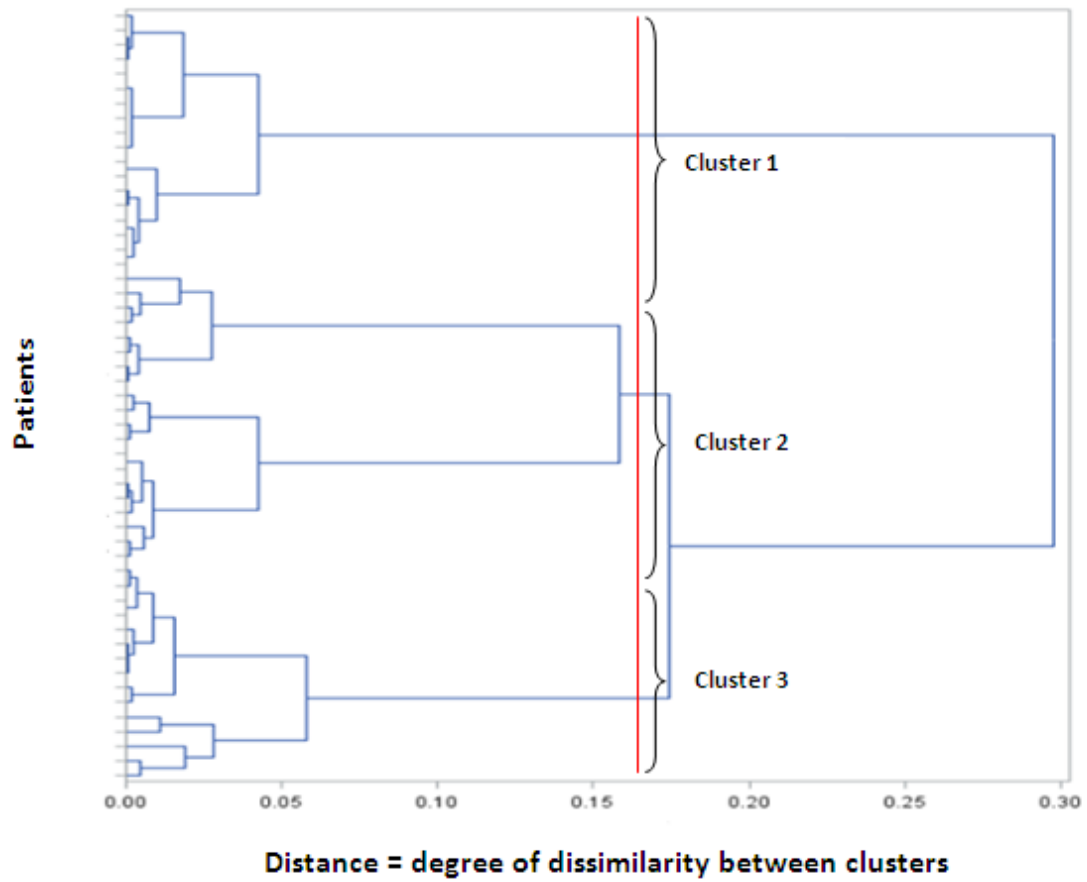

**Sup. figure 2 : Statistical analyses**

Supplement: jmedgenet-2013-101604supp_figure2.pdf [file jmedgenet-2013-101604supp_figure2.pdf]
